# Supplementary material
Source: HighWire-hosted journal article supplement (https://bmjopenquality.bmj.com/highwire/filestream/136175/field_highwire_adjunct_files/2/ds3737.docx)
Supplement: ds3737.docx [file ds3737.docx]

**QI Preliminary Questionnaire for FY1s - Weekend Medicine on Call**

1. When called to see a patient on a medical ward at the weekend, day or night, how often do you find it difficult to understand the patient’s case notes before reviewing the patient?

Never, it’s usually straightforward О

Occasionally О

Frequently О

Usually difficult to work out О

1. When called to see a medical patient, how confident do you feel that the notes will give you a good idea of what is going on? (Please mark the line)

Not confident at all Extremely confident

1. What areas of the patient’s case have you found are difficult to work out when on call?

Ceiling of care/DNAR decisions О

The diagnosis О

Treatment plan О

Presenting Complaint О

Nothing О

1. Would you like to see improved communication in the medical notes on a Friday, to facilitate ease of understanding for the On-call team?

Yes О

No, don’t think it’s a problem О

1. Do you think the Day teams on a Friday would be amenable to documenting some kind of a plan for the weekend On-call staff?

Yes О

Don’t think they have time О

No, don’t think it’s a problem О

|  | | | | | **ATSP re:** | | | | |
| --- | --- | --- | --- | --- | --- | --- | --- | --- | --- |
| **Ward** | **Time open notes** | **Time close notes** | **Time leave patient** | **Ease of understanding patient notes**  **(linear scale from 1 - difficult to 10 - easy)**  **Please draw cross on line where appropriate** | **Fluid prescription** | **Drug prescription** | **EWS score** | **Practical Procedure** | **Other** |
|  |  |  |  | 1 10 |  |  |  |  |  |
|  |  |  |  | 1 10 |  |  |  |  |  |
|  |  |  |  | 1 10 |  |  |  |  |  |
|  |  |  |  | 1 10 |  |  |  |  |  |
|  |  |  |  | 1 10 |  |  |  |  |  |
|  |  |  |  | 1 10 |  |  |  |  |  |
|  |  |  |  | 1 10 |  |  |  |  |  |
|  |  |  |  | 1 10 |  |  |  |  |  |
|  |  |  |  | 1 10 |  |  |  |  |  |
|  |  |  |  | 1 10 |  |  |  |  |  |
|  |  |  |  | 1 10 |  |  |  |  |  |
|  |  |  |  | 1 10 |  |  |  |  |  |
|  |  |  |  | 1 10 |  |  |  |  |  |
|  |  |  |  | 1 10 |  |  |  |  |  |
|  |  |  |  | 1 10 |  |  |  |  |  |
|  |  |  |  | 1 10 |  |  |  |  |  |
|  |  |  |  | 1 10 |  |  |  |  |  |
|  |  |  |  | 1 10 |  |  |  |  |  |
|  |  |  |  | 1 10 |  |  |  |  |  |
